# Supplementary material for: Prognosis Associated with Sub-Types of Hyperglycaemia in Pregnancy
Source: MDPI journal article supplement (doi:10.3390/jcm10173904), 2021-08-30
Supplement: s1 [file s1]

**Table S1:** Characteristics of women included and those not included in the study.

|                                              | <b>Included</b> | <b>Not included</b> | <b>p-value</b> |
|----------------------------------------------|-----------------|---------------------|----------------|
|                                              | n=4,665         | n=6,569             |                |
| <b>Screening for HIP before 22 WG</b>        |                 |                     |                |
| Fasting plasma glucose (mmol/L)              | 4.6 (0.6)       | 4.7 (0.6)           | <0.0001        |
| Gestational age at HIP screening (WG)        | 12.2 (4.2)      | 13.0 (5.3)          | <0.0001        |
| <b>Screening with OGTT at 22 WG or later</b> |                 |                     |                |
| Fasting plasma glucose (mmol/L)              | 4.4 (0.5)       | 4.5 (0.6)           | <0.0001        |
| 1-hour plasma glucose (mmol/L)               | 7.0 (1.8)       | 7.1 (1.9)           | 0.0067         |
| 2-hour plasma glucose (mmol/L)               | 6.1 (1.5)       | 6.2 (1.6)           | 0.3672         |
| Gestational age at OGTT (WG)                 | 27.2 (3.0)      | 28.0 (5.6)          | <0.0001        |
| <b>Metabolic characteristics</b>             |                 |                     |                |
| Age (years)                                  | 30.7 (5.5)      | 29.9 (5.6)          | <0.0001        |
| Pre-pregnancy body mass index (kg/m2)        | 25.2 (5.1)      | 24.8 (5.0)          | <0.0001        |
| Family history of diabetes                   | 1,291 (27.7)    | 1,631 (24.8)        | 0.0007         |
| Employment at beginning of pregnancy         | 1,887 (40.5)    | 2,436 (37.2)        | 0.0003         |
| Parity                                       | 2.1 (1.2)       | 2.2 (1.3)           | 0.1158         |
| <b>Previous pregnancy (ies)</b>              |                 |                     |                |
| History of hyperglycaemia in pregnancy       |                 |                     | <0.0001        |
| First child                                  | 1,814 (38.9)    | 2,449 (37.3)        |                |
| No                                           | 2,561 (54.9)    | 3,851 (58.6)        |                |
| Yes                                          | 290 (6.2)       | 269 (4.1)           |                |
| History of large-for-gestational-age infant  |                 |                     | 0.0016         |
| First child                                  | 1,814 (38.9)    | 2,449 (37.3)        |                |
| No                                           | 2,688 (57.6)    | 3,957 (60.2)        |                |
| Yes                                          | 163 (3.5)       | 163 (2.5)           |                |
| History of hypertensive disorders            |                 |                     | 0.0369         |
| First pregnancy                              | 1,265 (27.1)    | 1,686 (25.7)        |                |
| No                                           | 3,281 (70.3)    | 4,754 (72.4)        |                |
| Yes                                          | 119 (2.6)       | 129 (2.0)           |                |
| History of foetal death                      |                 |                     | 0.0192         |
| First pregnancy                              | 1,265 (27.1)    | 1,686 (25.7)        |                |
| No                                           | 3307 (70.9)     | 4707 (71.7)         |                |
| Yes                                          | 93 (2.0)        | 176 (2.7)           |                |
| <b>Ethnicity</b>                             |                 |                     | <0.0001        |
| European                                     | 1,269 (27.3)    | 1,874 (28.6)        |                |
| African                                      | 881 (18.9)      | 1,325 (20.2)        |                |
| North African                                | 1,378 (29.6)    | 1,885 (28.7)        |                |
| Asian                                        | 96 (2.1)        | 165 (2.5)           |                |
| Caribbean                                    | 270 (5.8)       | 369 (5.6)           |                |
| Indian-Pakistan-Sri Lankan                   | 519 (11.2)      | 531 (8.1)           |                |
| Other                                        | 243 (5.2)       | 410 (6.3)           |                |

Data are n (%) or mean (standard deviation)
